# Supplementary material
Source: MDPI journal article supplement (https://www.mdpi.com/2073-4344/10/4/448)
Supplement: s1 [file s1]

## Supplementary Materials

# C-H Bond Activation of Silyl-substituted Pyridines with Bis(phenolate)yttrium Catalysts as a facile Tool towards Hydroxyl-terminated *Michael*-type Polymers

Thomas M. Pehl <sup>1,†</sup>, Moritz Kränzlein <sup>1,†</sup>, Friederike Adams <sup>1,†</sup>, Andreas Schaffer <sup>1</sup> and Bernhard Rieger <sup>1,\*</sup>

<sup>1</sup> WACKER-Chair for Macromolecular Chemistry, Catalysis Research Center, Department of Chemistry, Technical University Munich, Lichtenbergstr. 4, 85748 Garching b. München, Germany

\* Correspondence: rieger@tum.de; Tel.: +49-89-289-13570

† These authors contributed equally to this work.

### 1. Catalyst characterization

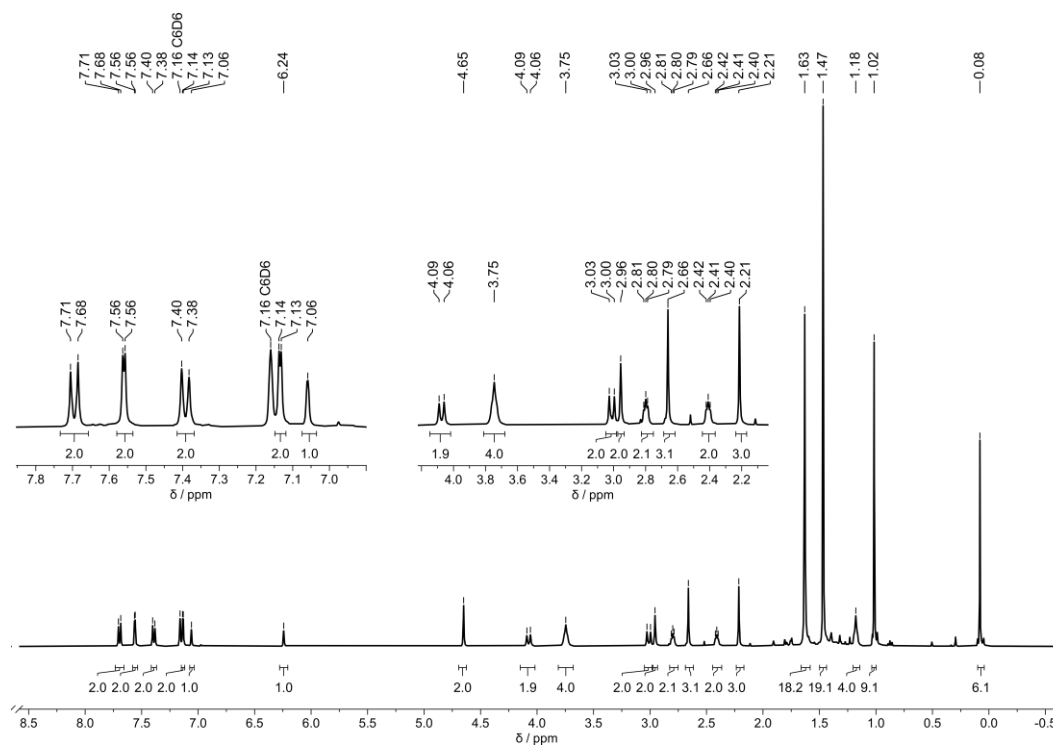

Figure S1: <sup>1</sup>H-NMR (400 MHz, C<sub>6</sub>D<sub>6</sub>, 300 K) of catalyst 4.

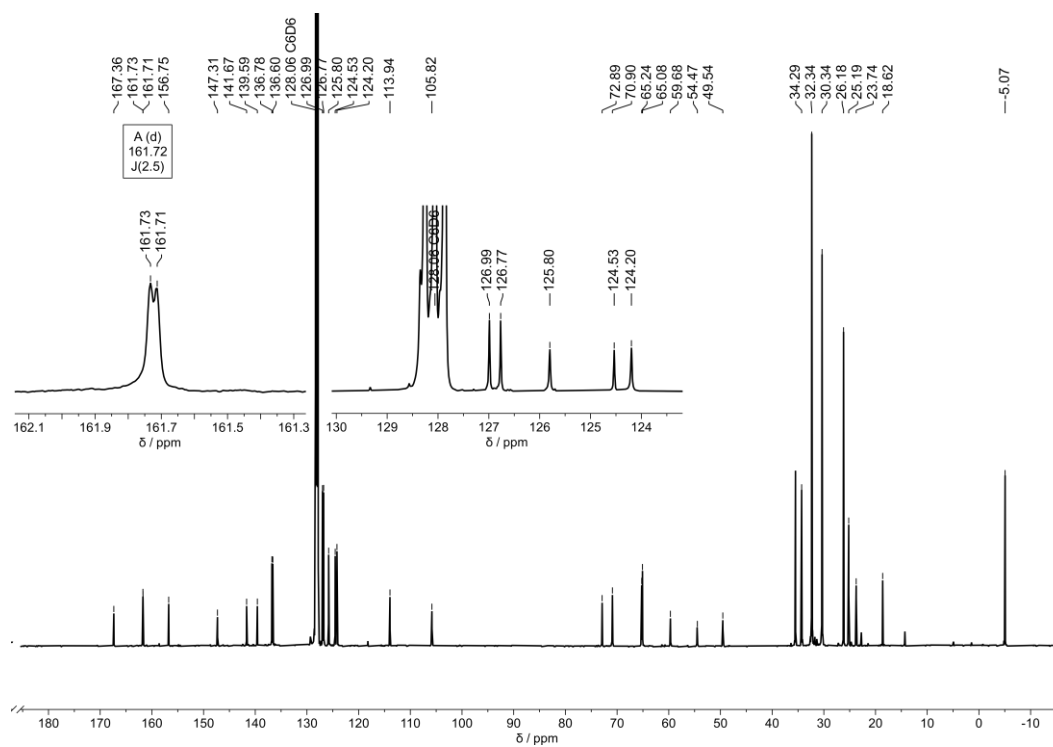

Figure S2:  $^{13}\text{C}$ -NMR (125 MHz,  $\text{C}_6\text{D}_6$ , 300 K) of catalyst 4.

## 2. End-group analysis

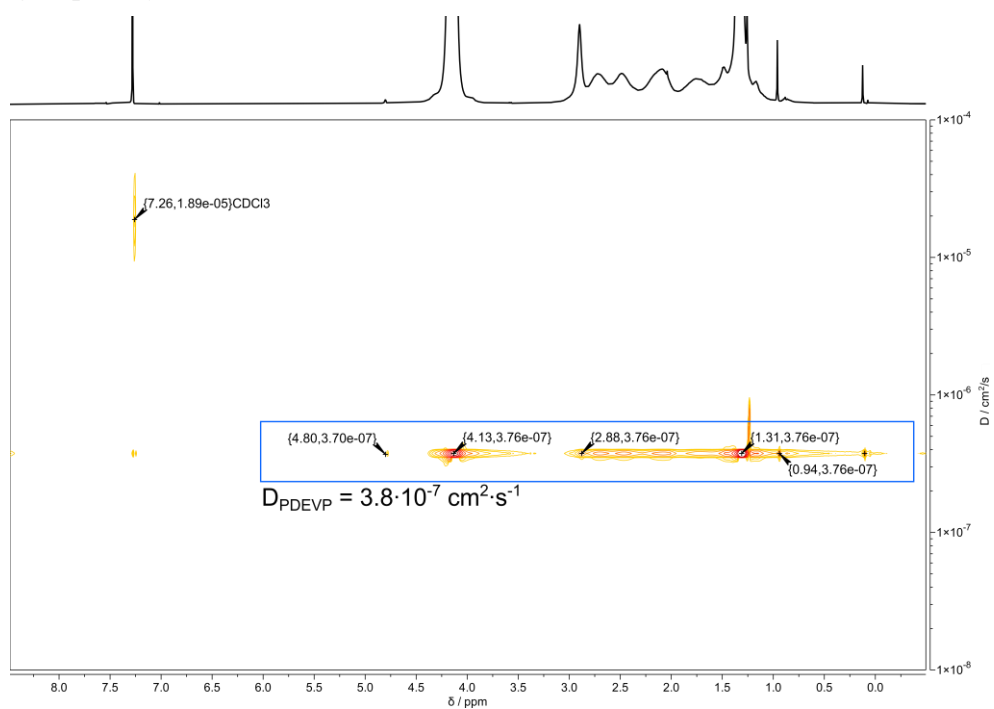

Figure S3: DOSY-NMR ( $\text{CDCl}_3$ , 400 MHz) of PDEVp ( $M_n = 43.4 \text{ kg mol}^{-1}$ ,  $D = 1.11$ ).

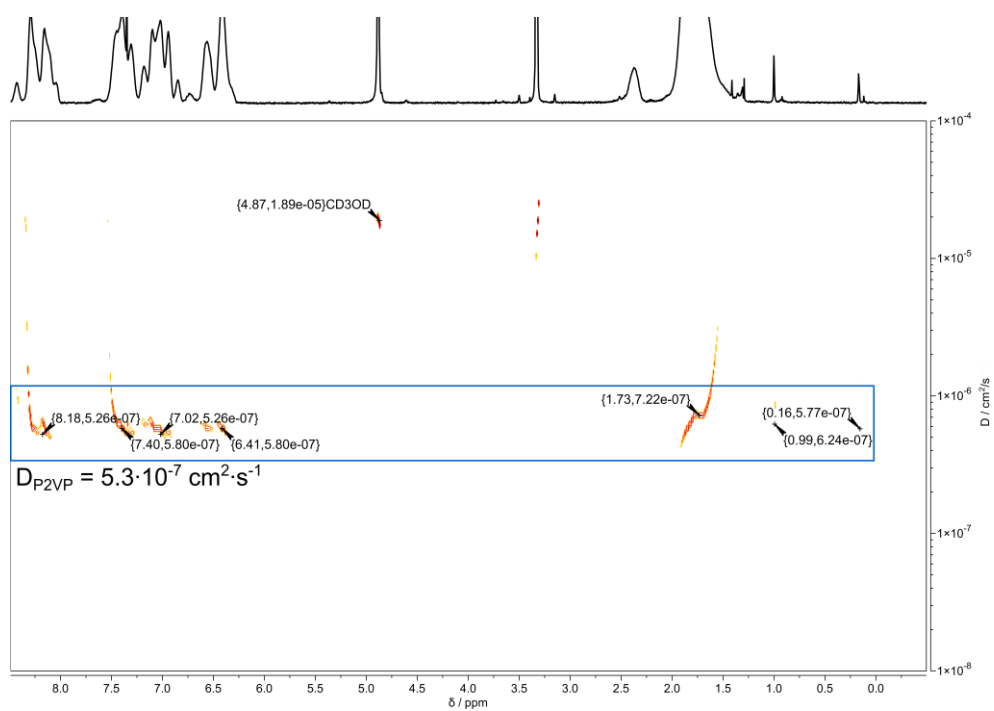

Figure S4: DOSY-NMR ( $\text{MeOD}$ , 400 MHz) of P2VP ( $M_n = 34.7 \text{ kg mol}^{-1}$ ,  $D = 1.07$ ).

## 3. Characterization of PDEVP

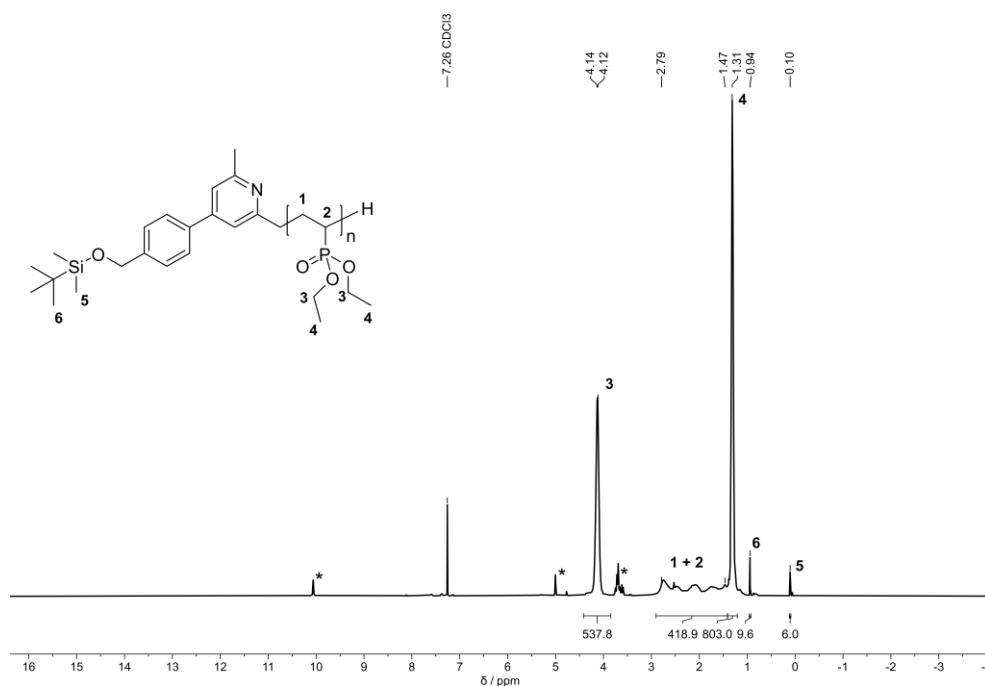

**Figure S5:**  $^1\text{H-NMR}$  ( $\text{CDCl}_3$ , 400 MHz) of PDEVP produced with catalyst 4 (Table 2, entry 4,  $M_{n,\text{abs}} = 16.6 \text{ kg/mol}$ ,  $D = 1.04$ ), impurities and artefacts are marked with \*.

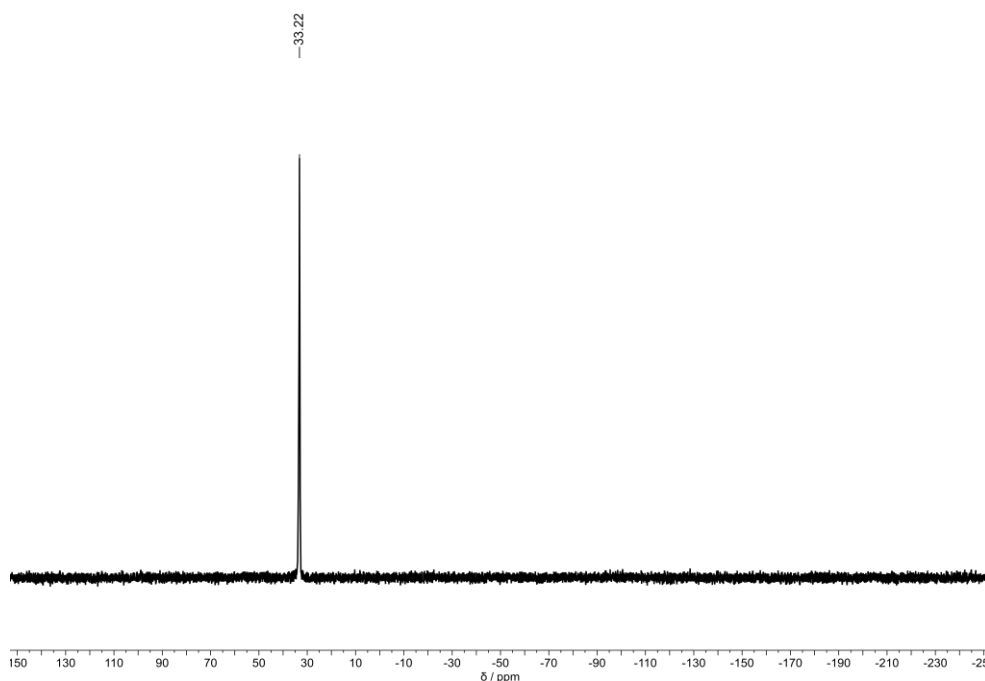

**Figure S6:**  $^{31}\text{P-NMR}$  ( $\text{CDCl}_3$ , 162 MHz) of PDEVP produced with catalyst 4 (Table 2, entry 5,  $M_{n,\text{abs}} = 104 \text{ kg/mol}$ ,  $D = 1.33$ ).

**$^1\text{H-NMR}$**  (400 MHz,  $\text{CDCl}_3$ , 300 K):  $\delta$  (ppm) = 0.10 (s, 6H,  $\text{Si}(\text{CH}_3)_2$ ), 0.94 (s, 9H,  $\text{Si}(\text{C}(\text{CH}_3)_3)_3$ ), 1.31 (m, 803H,  $\text{P}(\text{OCH}_2\text{CH}_3)_2$ ), 1.47-2.79 (m, 419H,  $\text{CH}_2\text{CHPOEt}_2$ ), 4.12-4.14 (m, 538H,  $\text{P}(\text{OCH}_2\text{CH}_3)_2$ ).

**$^{31}\text{P-NMR}$**  (125 MHz,  $\text{CDCl}_3$ , 300 K):  $\delta$  (ppm) = 33.22 ( $\text{P}_{\text{side-chain}}$ ).

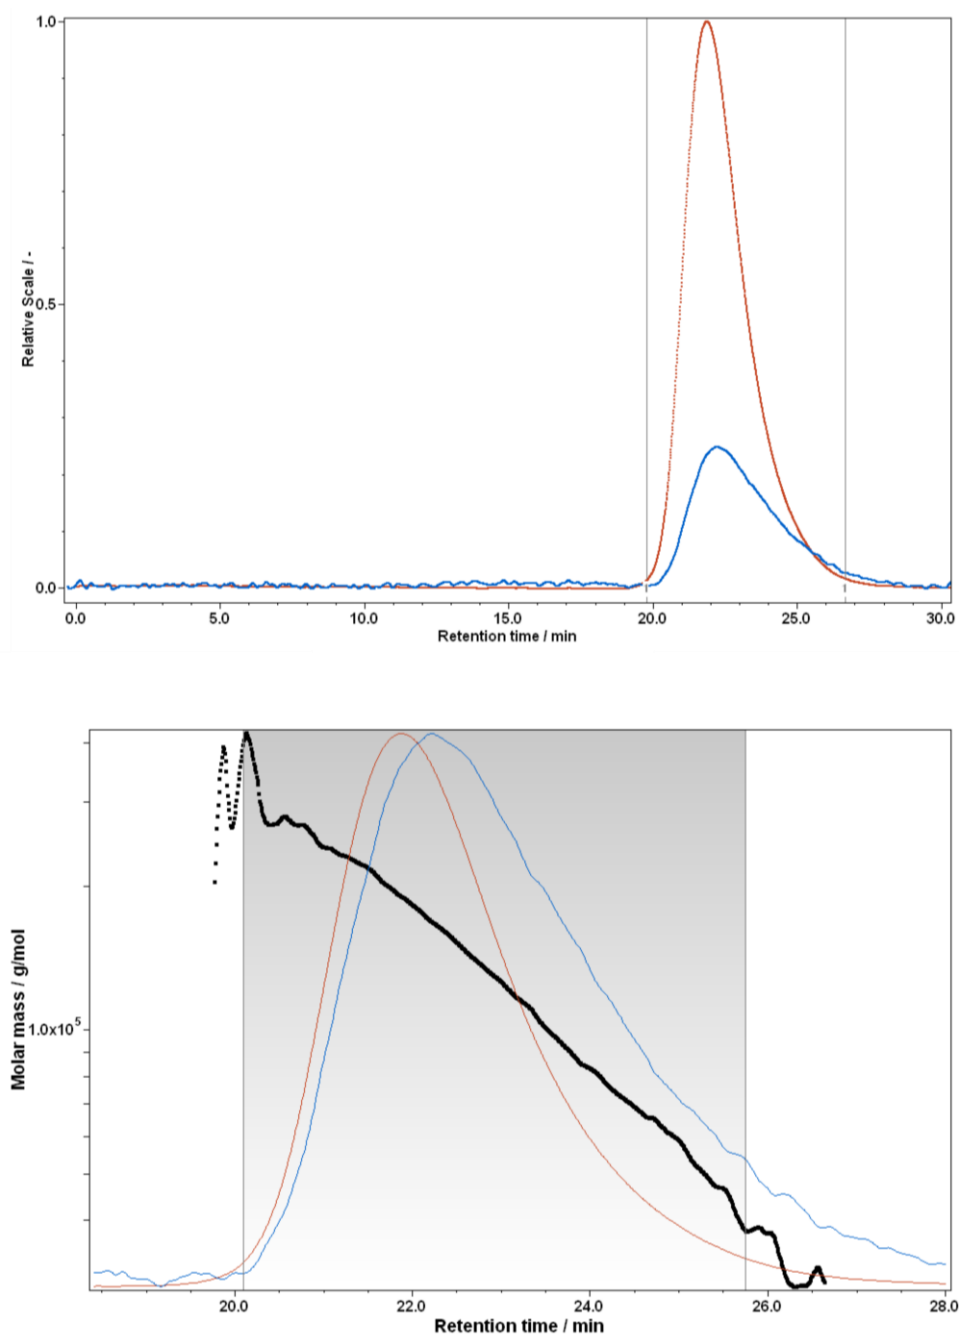

**Figure S7:** Representative SEC-MALS trace (top) and resulting fitting plot (bottom) for molecular weight determination of PDEVP produced with catalyst 4 (Table 2, entry 5,  $M_{n,abs} = 104$  kg/mol,  $D = 1.33$ ).

#### 4. Characterization of Poly(2-vinylpyridine)

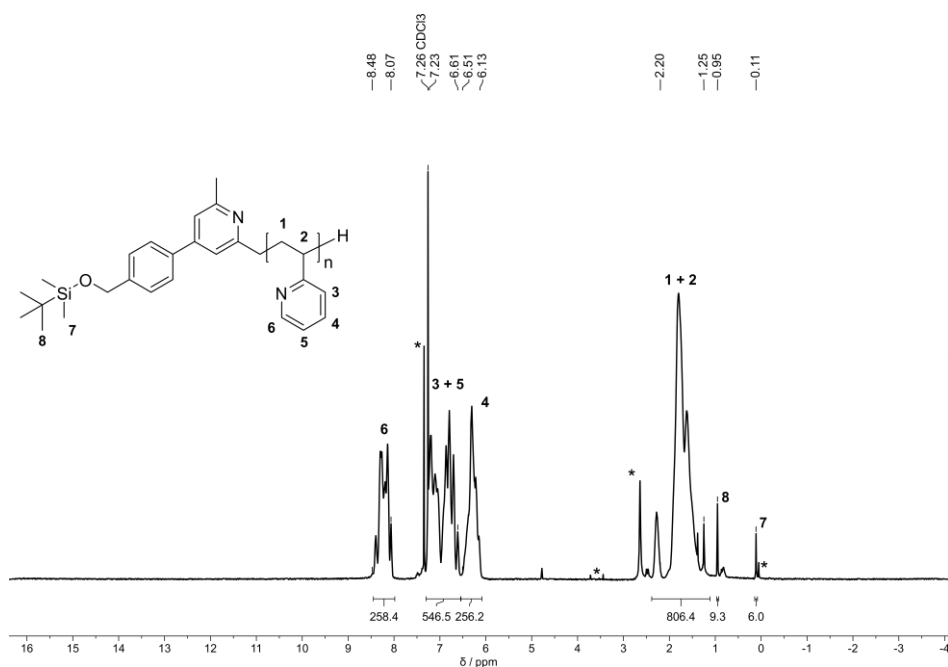

**Figure S8:**  $^1\text{H-NMR}$  ( $\text{CDCl}_3$ , 400 MHz) of P2VP produced with catalyst **4** (Table 3, entry 1,  $M_{n,\text{abs}} = 25.0$  kg/mol,  $D = 1.04$ ), impurities and artefacts are marked with \*.

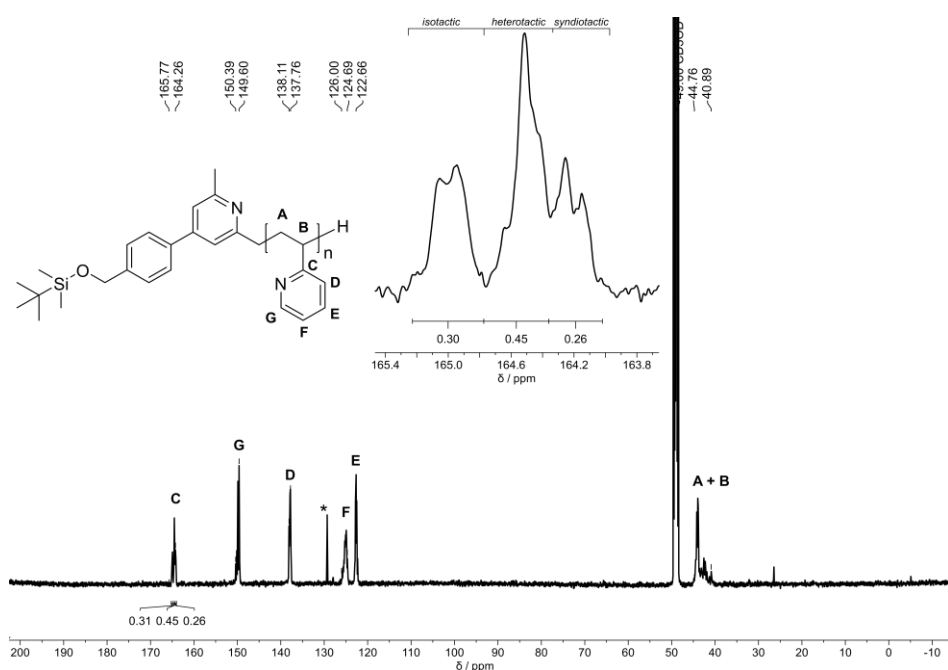

**Figure S9:**  $^{13}\text{C-NMR}$  (MeOD, 500 MHz) of P2VP and section of the quaternary  $^{13}\text{C}$  atom resonance of atactic P2VP produced with catalyst **4**, resonance assignment and microstructure determination according to Ref. [1], impurities and artefacts are marked with \*.

$^1\text{H-NMR}$  (400 MHz,  $\text{CDCl}_3$ , 300 K):  $\delta$  (ppm) = 0.11 (s, 6H,  $\text{Si}(\text{CH}_3)_2$ ), 0.95 (s, 9H,  $\text{Si}(\text{C}(\text{CH}_3)_3)$ ), 1.25-2.20 (m, 806H,  $\text{CH}_2\text{CHAr}$ ), 6.13-6.50 (m, 256H,  $\text{H}_{\text{Ar}}$ ), 6.51-7.23 (m, 456H,  $2\text{H}_{\text{Ar}}$ ), 8.07-8.48 (m, 258H,  $\text{H}_{\text{Ar}}$ ).

$^{13}\text{C}$ -NMR (100 MHz,  $\text{CDCl}_3$ , 300 K):  $\delta$  (ppm) = 40.9-44.8 (carbon-backbone), 122.7-123.0, 124.7-126.0, 137.8-138.1, 159.6-150.4, 164.3-165.8.

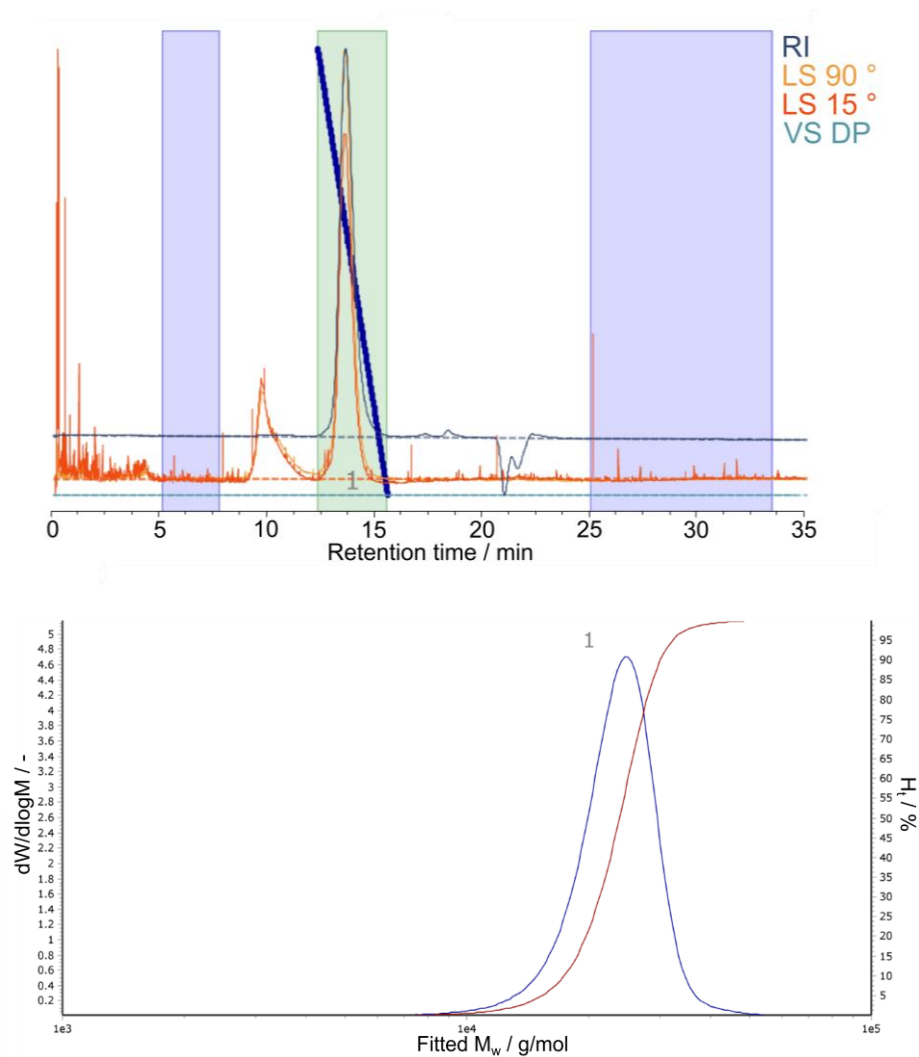

**Figure S10:** Representative SEC-trace (top) and distribution plot of molecular weight determination (bottom) of P2VP produced with catalyst **4** (Table 3, entry 3,  $M_{n,abs} = 22.6$  kg/mol,  $D = 1.06$ ). Signals in the light scattering detectors (orange, red) with retention time below 10 min are not detectable via RI (dark blue), therefore signals do not belong to polymeric material.

## 5. Deprotection results

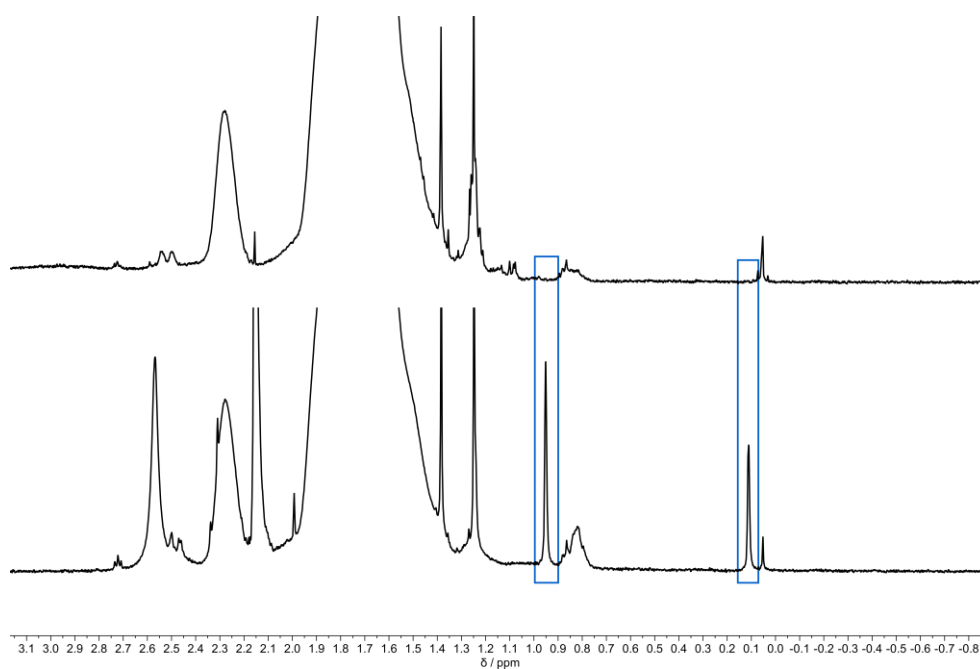

**Figure S11:** Representative comparison of  $^1\text{H-NMR}$  spectra (silyl range,  $\delta = -0.5 - 3.0$  ppm) of protected (bottom) and deprotected (top) P2VP (Table 4, entry 2) with close-up of the silyl region (TBDMS signals marked blue).

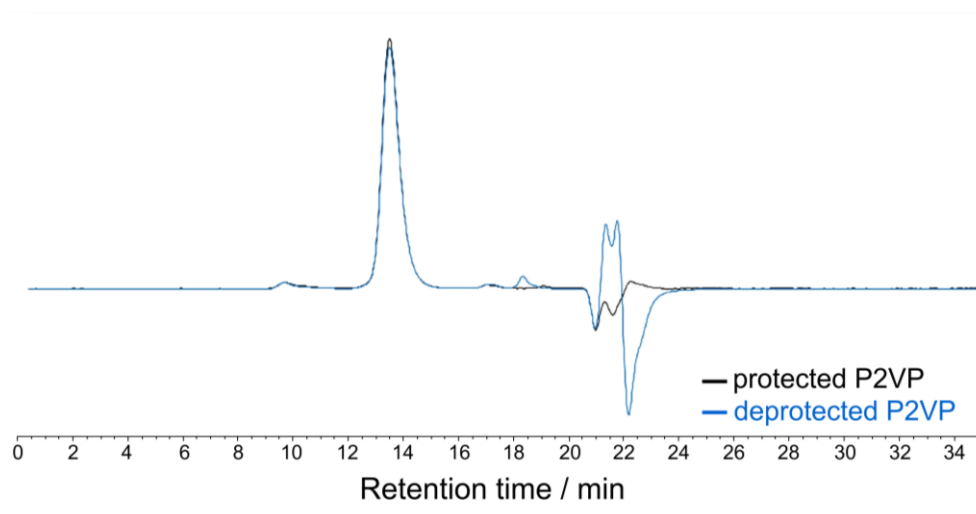

**Figure S12:** Overlay of SEC RI traces of P2VP protected and deprotected (Table 4, entry 2) (protected black, deprotected blue).



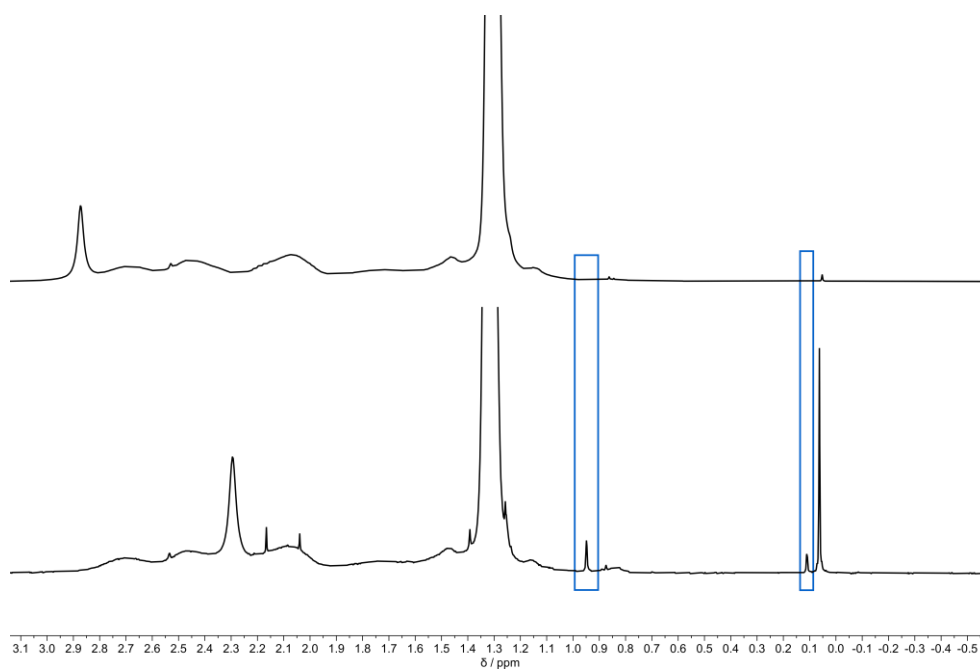

**Figure S13:** Representative comparison of  $^1\text{H}$ -NMRs (silyl range,  $\delta = -0.5 - 3.0$  ppm) of protected (bottom) and unprotected (top) PDEVP (Table 4, entry 1) with close-up of the silyl region (TBDMS signals marked blue).

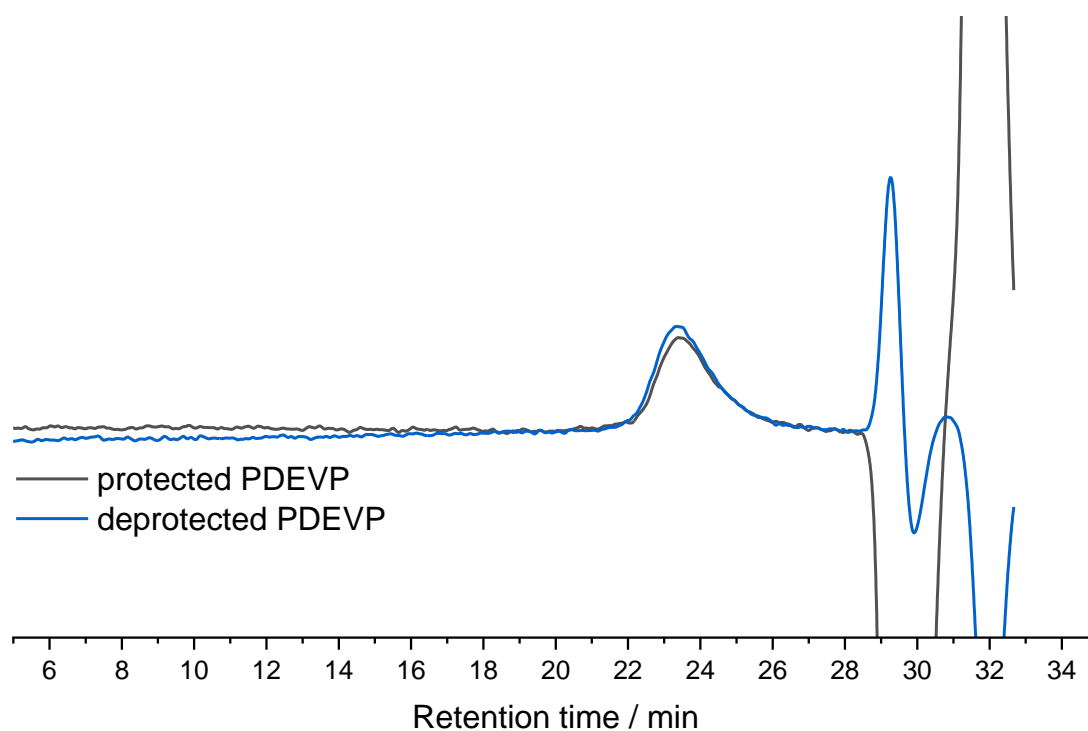

**Figure S14:** Overlay of SEC-MALS RI traces of PDEVP (Table 4, entry 1) protected and deprotected (protected black, deprotected blue).

## 6. Synthesis procedures

### 4-(4'-hydroxymethyl)benzyl)-2,6-dimethylpyridine [2]

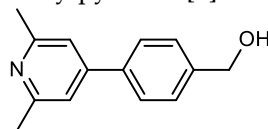

1

2.95 g (19.4 mmol, 1.1 eq.) 4-(hydroxymethyl)phenyl boronic acid are suspended in 120 mL ethanol and 2.48 g (17.5 mmol, 1.0 eq.) 4-chloro-2,6-dimethylpyridine in 150 mL toluene are added. To this suspension, a saturated sodium hydrogen carbonate solution (120 mL, 1.14M, 136 mmol, 7.7 eq.) is added and the two-phase mixture is degassed while stirring by applying 20 cycles of inert gas and vacuum until boiling is observed. Under argon overpressure, 4 mol% Pd(PPh<sub>3</sub>)<sub>4</sub> catalyst (0.82 g, 0.71 mmol, 0.04 eq.) are added before heating to 80 °C for 72 hours. After cooling to room temperature, black catalyst residue is removed via filtration and the phases are separated. The aqueous phase is extracted with 2×80 mL ethyl acetate and 1×100 mL chloroform, the organic phases are combined and dried over MgSO<sub>4</sub>. The solvent is removed *in vacuo* before purifying the crude product by column chromatography (alumina *Bronkhorst* activity grade 1, CHCl<sub>3</sub>:MeOH = 95:5) giving 4-(4'-hydroxymethylbenzyl)-2,6-dimethylpyridine) **1** as fine, white powder (1.84 g, 8.6 mmol, 49 %).

<sup>1</sup>H-NMR (400 MHz, CDCl<sub>3</sub>, 300 K): δ (ppm) = 2.58 (s, 6H, CH<sub>3</sub>), 4.76 (s, 2H, CH<sub>2</sub>OH), 7.17 (s, 2H, H<sub>Ar,Py</sub>), 7.46 (d, <sup>3</sup>J<sub>H,H</sub> = 8.24 Hz, 2H, H<sub>Ar,Benzyl</sub>), 7.61 (d, <sup>3</sup>J<sub>H,H</sub> = 8.42 Hz, 2H, H<sub>Ar,Benzyl</sub>).

<sup>13</sup>C-NMR (100 MHz, CDCl<sub>3</sub>, 300 K): δ (ppm) = 24.5, 64.6, 118.5, 127.2, 127.5, 137.8, 142.1, 149.0, 158.2.

DC: R<sub>f</sub> = 0.47 (chloroform:methanol = 95:5) [fluorescence staining]

ESI-MS: 214.29 m/z [M+H<sup>+</sup>].

EA: calc: C 78.84, H 7.09, N 6.57, O 7.50.

found: C 78.33, H 7.08, N 6.52.

### 4-(4'-(((*tert*-butyldimethylsilyl)oxy)methyl)phenyl)-2,6-dimethylpyridine [2]

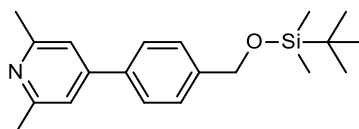

2

2.00 g (9.4 mmol, 1.0 eq.) unprotected pyridine **1** and 0.70 g (10.3 mmol, 1.1 eq.) imidazole are dissolved in 100 mL dry chloroform. 1.55 g (10.3 mmol, 1.1 eq.) *tert*-butyl-dimethylsilyl chloride are dissolved in 3 mL dry chloroform and are added to the alcohol mixture. The reaction solution is heated to 70 °C for 72 hours before removing the solvent *in vacuo*. 200 mL half-saturated sodium hydrogen carbonate solution (200 mL, 0.57M, 114 mmol, 12.1 eq.) are added to the crude product and the two-phase mixture is stirred for 30 min. The phases are separated and the aqueous phase is extracted with 3×150 mL benzene. The organic phases are combined and dried over MgSO<sub>4</sub>. The solvent is removed, yielding 4-(4'-(((*tert*-butyldimethylsilyl)oxy)methyl)phenyl)-2,6-dimethylpyridine **2** as a yellow, viscous liquid (3.00 g, 9.2 mmol, 98 %).

<sup>1</sup>H-NMR (400 MHz, C<sub>6</sub>D<sub>6</sub>, 300 K): δ (ppm) = 0.10 (s, 6H, Si(CH<sub>3</sub>)<sub>2</sub>), 1.03 (s, 9H, <sup>t</sup>Bu), 2.52 (s, 6H, CH<sub>3</sub>), 4.66 (s, 2H, CH<sub>2</sub>OH), 6.97 (s, 2H, H<sub>Ar,Py</sub>), 7.36 (d, <sup>3</sup>J<sub>H,H</sub> = 8.06 Hz, 2H, H<sub>Ar,Benzyl</sub>), 7.41 (d, <sup>3</sup>J<sub>H,H</sub> = 8.33 Hz, 2H, H<sub>Ar,Benzyl</sub>).

<sup>13</sup>C-NMR (100 MHz, C<sub>6</sub>D<sub>6</sub>, 300 K): δ (ppm) = -5.1, 18.6, 24.7, 26.1, 64.9, 118.2, 126.9, 127.3, 138.1, 142.4, 148.7, 158.6.

<sup>29</sup>Si-NMR (80 MHz, C<sub>6</sub>D<sub>6</sub>, 300 K): δ (ppm) = 20.04.

ESI-MS: 329.0 m/z [M+H<sup>+</sup>].

EA: calc: C 73.34, H 8.92, N 4.28, O 4.88, Si 8.57.

found: C 73.38, H 9.14, N 4.48.

## 7. References

1. Altenbuchner, P.T.; Adams, F.; Kronast, A.; Herdtweck, E.; Pöthig, A.; Rieger, B. Stereospecific catalytic precision polymerization of 2-vinylpyridine via rare earth metal-mediated group transfer polymerization with 2-methoxyethylamino-bis(phenolate)- yttrium complexes. *Polym. Chem.*, **2015**, *6*, 6796–6801.
2. Schaffer, A; Kränzlein, M.; Rieger, B. Synthesis and Application of Functional Group-Bearing Pyridyl-based Initiators to Rare-Earth Metal-Mediated Group-Transfer Polymerization. *Macromolecules* under review.
